# Supplementary material for: The Partnership to Improve Diabetes Education Trial: a Cluster Randomized Trial Addressing Health Communication in Diabetes Care
Source: Springer Nature journal article supplement (doi:10.1007/s11606-019-05617-z), 2020-01-09
Supplement: MOESM1 [file 17656576]

|  | Total Samplea | Excludeda | Includeda | p-valueb |
| --- | --- | --- | --- | --- |
| Patient characteristic | (N=410) | (N=46) | (N=364) |  |
| Age (years) | 51 [36 to 61] | 51 [36 to 60] | 52 [36 to 62] | 0.34 |
| Female, % (n) | 60% (248) | 59% (27) | 61% (221) | 0.79 |
| Race %(n) |  |  |  |  |
| White | 63% (259) | 63% (29) | 63% (230) | 1.00 |
| Black | 18% (72) | 17% (8) | 18% (64) |  |
| Other | 19% (79) | 20% (9) | 19% (70) |  |
| Hispanic % (n) | 24% (98) | 17% (8) | 25% (90) | 0.27 |
| Income <$20,000, % (n) | 82% (334) | 84% (38) | 82% (296) | 0.68 |
| Years since Diabetes diagnosis | 7.5 [1.0 to 19.5] | 8.0 [1.0 to 20.0] | 7.0 [2.0 to 16.4] | 0.83 |
| Education (years) | 12 [6 to 14] | 12 [6 to 14] | 12 [8 to 14] | 0.33 |
| S-TOFHLA, score | 34 [11 to 36] | 34 [12 to 36] | 34 [10 to 36] | 0.79 |
| DNT score | 0.4 [0.0 to 1.0] | 0.4 [0.0 to 1.0] | 0.6 [0.0 to 1.0] | 0.33 |
| Uninsured n (%) | 96% (390) | 98% (45) | 96% (345) | 0.47 |
| A1Cc | 9.1 [7.5 to 12.5] | 9.2 [7.5 to 12.3] | 9.1 [7.4 to 14.0] | 0.27 |
| BMI (kg/m2)c | 34 [27 to 47] | 34 [27 to 47] | 34 [25 to 42] | 0.28 |
| LDL (g/dL)c | 100 [55 to 148] | 100 [55 to 148] | 99 [58 to 150] | 0.41 |
| Diabetes-related behaviors |  |  |  |  |
| Summary of Diabetes Self-Care [0-91] Activities (SDSCA)c | 58 [36 to 77] | 58 [37 to 77] | 58 [32 to 82] | 0.20 |
| Personal Diabetes Questionnaire [3-18] Use of data to modify diet c | 8 [3 to 15] | 8 [3 to 15] | 7 [3 to 13] | 0.03 |
| Personal Diabetes Questionnaire [3-18] Poor eating behavior c | 10 [6 to 15] | 10 [6 to 15] | 9 [5 to 14] | 0.40 |
| Adherence to Refills and Medication Scale (ARMS) [12-48]c | 17 [12 to 23] | 17 [12 to 23] | 17 [12 to 24] | 0.84 |
| Diabetes Treatment Satisfaction Questionnaire (DTSQ) [0-36]c | 29 [19 to 36] | 30 [20 to 36] | 29 [19 to 36] | 0.06 |
| Perceived Diabetes Self-management scale (PDSMS) [8-40]c | 16 [10 to 24] | 16 [10 to 24] | 17 [10 to 24] | 0.07 |

**Table S1**. Baseline characteristics of participants whether they were included or excluded from analyses

aData are expressed as % (n) or median [10th-90th percentile]

bCalculated using the Pearson chi-square test for categorical variables and the Wilcoxon rank sum test for continuous variables.

cThe descriptive statistics at baseline for each outcome measure
